# Supplementary material for: Epidemiology of Haemophilus parasuis isolates from pigs in China using serotyping, antimicrobial susceptibility, biofilm formation and ERIC-PCR genotyping
Source: PeerJ. 2018 Jun 13;6:e5040. doi: 10.7717/peerj.5040 (PMC6004116; doi:10.7717/peerj.5040)
Supplement: Supplemental Information 1 [file peerj-06-5040-s001.xlsx]

## Sheet: Bioﬁlm positive 
MICs of H.parasuis with Bioﬁlm positive （n=99）
Number	Amoxicillin	Ampicillin	Cephalexin	Cefepime	Ceftiofur	Ciprofloxacin	Doxycycline	Enrofloxacin	Florfenicol	Gamithromycin	Gentamicin	Kanamycin	Lincomycin	Lomefloxacin	Oxacillin	Penicillin	Polymyxin B	Spectinomycin	Tulathromycin	Tildipirosin	Tetracycline	Tilmicosin	Trimethoprim/ sulphamethoxazole
HPS3	1	2	32	<0.25	<0.25	<0.25	0.25	0.25	1	2	<0.25	0.5	128	1	256	4	0.5	1	32	1	1	8	0.5
HPS4	0.25	4	8	<0.25	0.25	8	1	0.5	1	64	2	8	8	1	4	0.5	0.25	1	1	1	32	16	8
HPS5	1	0.5	16	1	1	1	1	8	32	1	8	16	4	2	32	1	1	2	1	2	4	4	16
HPS6	0.25	0.5	32	<0.25	0.25	0.5	0.25	2	0.25	64	4	8	4	1	1	0.5	0.5	0.25	4	0.5	1	8	16
HPS7	0.25	8	32	1	0.25	2	2	2	8	64	8	32	32	4	8	32	0.5	2	512	2	8	16	16
HPS8	0.5	0.5	8	0.5	0.5	4	0.5	32	2	0.5	8	64	8	16	2	1	0.5	8	2	4	0.5	32	32
HPS9	0.25	1	8	<0.25	0.5	16	0.5	16	2	512	2	2	16	4	2	2	1	1	16	1	8	8	128
HPS11	0.5	1	16	0.5	128	0.5	512	1	4	32	256	256	256	1	32	32	256	512	32	512	4	128	128
HPS12	2	0.5	1	1	0.5	2	0.5	8	32	256	32	>512	>512	4	1	0.5	64	32	64	>512	2	4	512
HPS15	0.5	0.5	8	0.5	0.5	8	0.5	16	2	0.5	8	16	4	16	4	0.5	0.5	8	1	0.5	0.5	32	32
HPS16	2	1	128	>512	256	16	32	16	512	>512	>512	>512	>512	64	512	2	>512	>512	>512	>512	256	>512	256
HPS17	0.25	16	4	2	0.25	8	0.25	4	0.5	256	4	8	1	8	2	64	0.25	8	8	0.25	16	8	16
HPS18	0.25	1	0.25	2	4	1	512	0.5	2	256	16	32	512	0.5	0.25	2	512	64	512	512	4	1	0.25
HPS19	16	0.5	16	0.5	0.5	16	0.5	16	1	0.5	16	32	16	32	4	0.5	1	16	1	0.5	1	64	16
HPS21	0.25	0.5	1	<0.25	0.25	0.25	1	<0.25	0.5	512	16	16	4	<0.25	0.5	0.5	4	0.25	8	0.5	0.25	1	0.25
HPS22	0.25	1	16	<0.25	0.25	8	1	1	1	256	4	16	8	1	4	0.5	1	2	64	16	32	16	8
HPS23	32	0.5	8	1	0.5	8	2	8	1	0.5	32	64	32	32	16	0.5	0.5	32	0.5	8	1	16	16
HPS24	0.25	16	32	《0.25	2	4	8	1	1	256	512	512	8	0.5	32	16	0.25	32	1	0.5	32	128	16
HPS26	0.25	2	2	2	0.25	4	2	4	0.5	512	4	16	8	4	2	4	0.25	4	8	16	4	4	16
HPS27	0.5	1	4	<0.25	4	4	0.5	2	4	64	4	8	8	2	2	0.5	0.25	0.25	4	4	8	8	16
HPS28	0.25	1	512	<0.25	0.25	4	1	0.5	2	512	8	32	4	<0.25	16	2	1	0.5	32	2	8	4	16
HPS31	16	0.5	8	2	<0.25	1	32	16	8	0.5	1	>512	16	16	16	1	0.5	2	1	1	<0.25	16	0.25
HPS32	0.5	4	4	<0.25	0.25	0.5	2	0.25	1	64	2	8	16	0.25	4	0.5	0.5	2	4	4	2	8	16
HPS33	64	0.5	16	<0.25	1	1	8	<0.25	16	256	2	32	16	0.25	16	0.25	8	2	128	0.5	2	8	16
HPS35	0.25	8	8	2	2	4	0.5	8	1	512	512	512	64	4	32	2	512	16	4	512	8	16	32
HPS37	16	0.5	16	0.5	0.5	2	0.5	2	8	>512	4	8	64	8	8	0.5	0.5	8	1	8	0.5	16	16
HPS39	0.5	0.5	4	0.5	0.5	16	0.5	32	1	0.5	4	8	4	64	1	0.5	0.5	8	0.5	0.5	0.5	16	16
HPS40	0.25	2	16	<0.25	0.25	16	0.5	8	0.5	0.25	8	16	4	8	8	2	0.5	0.25	8	0.25	64	16	8
HPS41	0.25	0.5	16	<0.25	0.25	1	0.5	<0.25	0.5	64	8	16	128	《0.25	2	0.25	0.25	0.5	4	32	0.5	16	32
HPS42	1	1	1	1	1	1	1	1	1	1	16	64	8	1	1	1	1	8	4	1	1	256	1
HPS43	1	8	4	<0.25	0.25	0.5	0.5	<0.25	0.5	64	4	16	2	0.5	4	2	0.25	1	1	1	2	8	1
HPS44	0.25	0.5	2	<0.25	0.25	1	1	0.5	0.5	16	4	16	4	0.5	2	0.5	0.25	0.5	1	2	4	4	8
HPS45	0.25	1	4	<0.25	0.25	8	1	1	1	0.5	4	16	4	1	1	0.5	0.25	4	4	1	16	8	16
HPS46	0.25	1	512	<0.25	0.25	8	0.5	2	256	512	16	128	8	1	128	0.5	64	1	2	4	16	8	16
HPS48	8	0.5	4	0.5	0.5	8	0.5	4	0.5	0.5	8	8	32	16	4	1	0.5	4	0.5	1	0.5	8	16
HPS49	32	0.5	8	0.5	512	4	0.5	2	0.5	0.5	8	16	8	4	8	0.5	0.5	4	0.5	2	0.5	32	64
HPS50	0.25	2	4	<0.25	1	2	2	0.25	2	64	2	16	8	0.5	2	0.25	0.25	32	16	8	8	16	16
HPS52	0.5	16	16	<0.25	<0.25	1	1	2	4	8	2	16	8	2	0.5	2	0.25	32	128	32	16	128	16
HPS54	0.25	2	32	<0.25	0.25	0.25	1	4	32	256	32	16	8	4	0.5	0.25	1	0.5	4	0.25	0.25	4	2
HPS55	0.25	0.5	4	<0.25	0.25	16	1	1	0.5	16	8	8	4	1	4	0.5	0.5	4	8	0.5	64	8	16
HPS56	1	512	16	1	1	1	1	1	1	512	4	>512	1	1	8	1	1	4	1	512	32	4	512
HPS59	0.25	8	8	2	0.25	0.5	1	32	2	0.5	1	4	512	8	8	32	0.25	16	2	0.5	0.25	16	0.5
HPS61	0.25	<0.25	32	<0.25	0.25	0.25	1	<0.25	1	0.5	16	32	4	<0.25	2	0.5	1	2	8	1	0.25	8	4
HPS64	128	512	>512	>512	256	>512	>512	32	>512	128	64	>512	32	32	>512	>512	16	>512	>512	>512	>512	8	512
HPS65	0.25	32	2	0.5	0.25	0.25	1	4	0.5	64	16	256	4	4	0.25	0.5	0.25	16	8	1	0.25	16	128
HPS67	16	512	16	128	64	0.5	4	0.5	8	>512	128	>512	64	2	>512	256	>512	256	>512	>512	128	16	256
HPS68	0.5	0.5	16	0.5	0.5	0.5	8	1	4	0.5	4	8	32	0.5	1	>512	0.5	2	2	0.5	16	16	32
HPS69	1	0.25	16	4	<0.25	16	8	4	512	0.5	1	16	16	32	16	0.5	0.5	8	2	2	<0.25	16	32
HPS70	1	0.5	8	<0.25	0.25	2	0.5	2	2	64	8	16	4	1	2	0.5	0.5	0.25	2	0.25	8	8	8
HPS71	0.25	64	16	1	1	8	2	1	0.5	16	512	512	4	2	512	256	0.25	16	2	0.5	32	64	8
HPS73	0.25	1	16	<0.25	0.25	0.25	512	<0.25	1	64	8	8	512	<0.25	64	1	0.25	1	4	512	0.25	128	8
HPS74	2	0.25	8	<0.25	<0.25	<0.25	0.5	1	1	0.25	2	4	8	1	16	0.25	0.25	8	8	4	0.25	8	4
HPS75	1	0.5	0.5	1	<0.25	0.25	1	4	8	4	2	64	128	1	32	1	128	8	32	32	0.25	16	0.25
HPS76	0.25	1	8	<0.25	0.25	1	0.5	1	0.5	256	4	8	2	1	2	0.25	0.25	0.25	8	0.25	4	16	8
HPS78	0.25	4	1	<0.25	0.25	1	1	4	0.5	0.5	4	4	2	2	1	1	0.25	2	16	1	2	4	8
HPS79	1	1	8	1	1	8	1	16	4	2	32	>512	8	16	16	1	16	32	2	2	1	8	128
HPS81	0.25	1	2	2	0.25	0.25	0.5	0.5	1	512	4	8	8	<0.25	4	1	1	1	8	0.5	0.25	2	16
HPS82	4	0.5	8	0.5	0.5	0.5	0.5	0.5	0.5	>512	8	32	8	0.5	4	0.5	0.5	8	2	0.5	0.5	32	8
HPS84	0.25	2	8	<0.25	0.25	8	2	1	1	0.25	8	16	4	2	8	1	0.25	1	2	4	16	8	16
HPS86	0.25	2	0.5	<0.25	0.25	2	0.5	1	0.5	512	2	16	4	2	0.25	1	0.25	1	8	0.5	8	0.5	128
HPS87	0.25	16	8	1	0.5	4	1	4	1	64	2	8	4	4	4	64	0.25	0.25	1	16	0.25	512	2
HPS88	32	0.5	4	0.5	0.5	0.5	0.5	0.5	0.5	0.5	16	32	8	0.5	8	0.5	0.5	8	4	2	0.5	8	16
HPS89	0.25	2	8	0.5	0.25	8	1	4	4	256	8	8	16	1	8	32	0.25	1	32	1	32	16	16
HPS90	0.25	1	8	4	0.25	1	8	16	8	512	16	16	16	16	8	16	0.25	1	32	2	8	16	16
HPS91	128	>512	64	0.5	0.5	2	0.5	16	1	0.5	>512	>512	8	8	128	>512	0.5	16	1	0.5	32	128	32
HPS93	0.25	8	2	<0.25	0.25	8	1	8	2	256	8	16	4	2	2	2	0.25	4	4	2	16	8	16
HPS94	0.25	32	8	<0.25	0.25	8	0.25	2	2	64	512	512	64	2	32	32	0.25	16	1	0.5	16	64	16
HPS96	16	0.5	8	0.5	0.5	0.5	0.5	0.5	0.5	0.5	16	16	16	1	8	0.5	0.5	16	0.5	0.5	1	32	32
HPS98	0.25	1	8	<0.25	0.5	1	1	0.5	2	0.25	8	16	8	1	8	0.5	2	2	8	0.25	1	32	16
HPS99	0.5	0.5	4	1	0.5	2	2	8	4	4	2	4	>512	8	0.5	0.5	>512	1	1	>512	32	2	64
HPS102	0.25	2	1	<0.25	4	4	1	8	0.25	256	64	128	16	4	64	2	0.25	32	8	0.25	16	16	8
HPS103	1	512	4	2	<0.25	32	16	32	256	0.5	8	32	2	64	4	2	0.5	32	2	0.5	0.5	4	0.25
HPS104	0.25	1	32	<0.25	0.5	8	1	1	16	16	8	8	8	1	8	1	0.25	2	4	1	4	8	16
HPS105	0.5	16	4	0.5	8	32	128	16	32	256	64	64	512	8	8	32	512	32	16	512	64	128	32
HPS106	0.25	0.5	8	<0.25	0.25	8	0.25	2	0.5	0.5	1	8	4	1	4	0.5	0.25	0.25	4	1	8	8	4
HPS108	1	512	8	1	<0.25	64	64	16	128	4	32	64	4	64	16	4	0.5	64	16	8	32	16	0.25
HPS109	1	0.5	16	1	<0.25	4	2	1	4	1	4	4	32	1	2	0.5	1	32	2	1	0.5	64	0.25
HPS110	1	2	8	2	0.5	4	0.5	1	2	0.5	16	64	32	16	16	0.5	0.5	16	2	0.5	2	32	64
HPS111	0.25	0.5	4	<0.25	0.25	2	0.5	2	1	64	4	8	0.5	1	4	0.5	0.25	2	0.5	0.25	8	4	2
HPS112	8	0.5	8	1	<0.25	2	2	8	4	0.5	8	4	4	64	8	1	0.5	4	0.5	0.5	8	8	0.25
HPS113	4	64	2	1	<0.25	0.5	1	4	2	>512	16	8	>512	16	2	4	0.5	64	>512	>512	16	512	64
HPS114	64	>512	>512	>512	>512	8	32	8	128	4	32	32	>512	32	>512	>512	0.5	>512	0.5	8	32	>512	128
HPS115	16	0.5	4	1	0.5	0.5	4	0.5	2	0.5	32	64	1	1	0.5	0.5	0.5	32	16	1	4	2	0.5
HPS116	2	256	4	2	<0.25	16	4	2	16	1	32	16	8	1	16	2	0.5	16	4	8	2	64	16
HPS117	0.25	4	64	0.5	0.25	2	1	8	16	512	4	64	4	4	512	4	8	0.5	64	0.25	4	4	2
HPS119	64	2	8	0.5	0.5	4	1	4	8	0.5	32	>512	32	8	16	0.5	0.5	2	1	0.5	32	64	64
HPS124	16	0.5	2	0.5	0.5	0.5	0.5	0.5	1	0.5	16	32	4	0.5	0.5	0.5	0.5	16	2	1	0.5	2	0.5
HPS126	32	>512	128	0.5	0.5	0.5	0.5	0.5	1	0.5	8	16	8	0.5	>512	>512	1	16	16	2	0.5	256	0.5
HPS127	16	0.5	8	0.5	0.5	0.5	0.5	0.5	0.5	0.5	1	2	2	0.5	16	0.5	0.5	4	2	0.5	0.5	8	0.5
HPS128	16	0.5	2	0.5	0.5	0.5	0.5	0.5	1	0.5	16	32	16	0.5	0.5	0.5	0.5	16	2	2	0.5	2	0.5
HPS130	0.25	4	1	2	0.25	2	0.5	4	0.5	0.5	4	8	4	4	2	2	0.25	1	8	4	4	2	8
HPS131	64	512	32	0.5	0.5	4	0.5	2	0.5	0.5	>512	>512	8	16	128	>512	0.5	4	1	0.5	32	128	32
HPS132	0.5	2	8	<0.25	<0.25	0.25	1	0.5	2	8	2	8	16	0.5	0.5	0.5	0.25	16	64	32	2	32	32
HPS133	64	512	32	0.5	0.5	8	0.5	4	0.5	0.5	>512	>512	2	32	128	>512	0.5	1	1	1	16	64	64
HPS135	0.25	1	4	4	0.25	0.5	0.5	8	8	512	4	8	16	8	8	4	0.25	1	32	1	4	4	16
HPS137	16	0.5	0.5	0.5	0.5	0.5	0.5	0.5	2	0.5	4	16	32	0.5	0.5	0.5	1	8	2	0.5	1	2	0.5
HPS140	1	0.5	8	1	<0.25	1	1	8	2	0.5	8	16	8	2	1	1	1	16	2	1	<0.25	16	32
HPS141	4	8	32	0.5	0.5	2	2	4	2	4	1	4	4	16	16	1	16	128	512	64	4	64	128
HPS143	1	1	4	1	1	1	1	8	0.5	2	16	8	8	2	16	1	0.5	8	2	512	1	2	32

## Sheet: Bioﬁlm negative
MICs of H.parasuis with bioﬁlm negative（n=44）
Number	Amoxicillin	Ampicillin	Cephalexin	Cefepime	Ceftiofur	Ciprofloxacin	Doxycycline	Enrofloxacin	Florfenicol	Gamithromycin	Gentamicin	Kanamycin	Lincomycin	Lomefloxacin	Oxacillin	Penicillin	Polymyxin B	Spectinomycin	Tildipirosin	Tetracycline	Tulathromycin	Tilmicosin	Trimethoprim/sulphamethoxazole
HPS1	0.25	2	4	<0.25	2	2	0.5	2	16	256	4	512	8	1	16	2	0.25	16	0.25	4	4	4	16
HPS2	2	0.5	32	<0.25	<0.25	0.25	1	0.5	2	16	2	8	16	4	0.5	1	0.5	4	1	2	8	16	32
HPS10	0.25	2	4	<0.25	0.25	4	2	16	4	512	8	8	64	4	16	8	0.25	4	1	8	64	4	16
HPS13	16	64	4	0.5	0.5	8	0.5	2	0.5	0.5	16	256	16	64	32	256	0.5	32	0.5	32	1	8	32
HPS14	0.25	1	4	<0.25	0.25	2	0.5	2	1	0.5	2	4	4	2	2	1	0.25	0.5	1	8	4	4	8
HPS20	0.5	8	8	0.5	0.25	32	0.5	8	1	256	2	4	16	8	2	2	0.5	2	1	128	8	32	16
HPS25	64	0.5	8	0.5	0.5	4	0.5	4	8	0.5	8	16	16	16	8	>512	1	16	0.5	1	1	4	32
HPS29	0.5	0.5	16	0.5	0.5	8	0.5	2	1	0.5	16	32	8	16	8	0.5	0.5	4	2	2	8	8	32
HPS30	4	4	4	<0.25	<0.25	1	0.5	0.5	1	2	2	8	8	1	2	0.5	0.25	32	2	2	4	16	128
HPS34	0.25	1	4	<0.25	0.25	0.25	0.25	0.25	0.25	32	8	32	2	<0.25	2	0.5	0.25	2	1	0.25	8	8	8
HPS36	0.5	0.5	4	0.5	0.5	32	0.5	8	1	0.5	16	16	4	128	8	0.5	0.5	128	0.5	0.5	1	16	>512
HPS38	4	0.5	64	<0.25	32	16	512	1	4	64	16	512	512	1	64	0.25	64	256	512	64	32	512	32
HPS47	0.25	2	2	<0.25	0.25	1	0.25	<0.25	0.25	512	16	16	512	<0.25	2	0.25	0.25	0.25	512	2	8	16	256
HPS51	0.25	256	8	<0.25	0.5	0.25	0.25	2	0.25	16	2	8	1	2	2	256	0.25	8	0.25	8	32	4	16
HPS53	0.25	2	4	<0.25	0.25	0.25	1	2	16	32	1	16	4	0.5	8	2	0.25	4	8	1	0.25	8	16
HPS57	0.25	0.25	16	<0.25	0.25	2	1	1	1	4	8	8	4	1	8	0.5	0.25	2	1	8	4	8	16
HPS58	0.25	1	8	<0.25	0.25	1	1	1	0.5	16	4	8	16	1	8	0.5	0.25	1	0.5	16	8	16	128
HPS60	0.25	4	8	<0.25	0.25	0.25	0.5	<0.25	1	256	2	8	4	<0.25	2	0.5	0.25	0.5	0.5	1	0.5	4	4
HPS62	1	4	1	<0.25	<0.25	1	0.5	0.5	2	32	2	8	8	2	32	0.5	1	8	8	2	16	16	128
HPS63	0.25	2	4	<0.25	0.25	0.25	0.5	<0.25	8	256	4	8	8	0.25	4	2	0.5	8	0.5	4	4	8	32
HPS66	0.25	16	4	<0.25	0.25	8	2	4	0.5	256	8	16	2	4	32	2	0.25	0.5	4	16	1	8	16
HPS72	0.25	1	2	<0.25	0.25	8	0.25	<0.25	0.5	32	4	16	1	<0.25	0.5	0.25	0.25	8	2	32	32	4	4
HPS77	0.25	0.5	8	<0.25	0.25	16	1	8	0.5	512	8	16	8	4	4	1	0.25	1	1	32	32	8	1
HPS80	1	>512	64	1	1	1	2	1	1	1	8	16	16	1	>512	>512	1	2	4	0.5	4	4	1
HPS83	0.5	1	4	<0.25	<0.25	0.5	1	1	0.25	0.5	2	2	8	1	0.25	0.5	0.25	0.5	1	2	16	8	16
HPS85	2	0.5	8	<0.25	<0.25	0.25	1	0.25	1	16	4	4	16	0.5	8	0.25	0.5	16	16	1	64	8	16
HPS92	0.25	1	1	0.5	8	1	1	1	4	256	2	2	256	1	0.25	32	512	32	512	16	4	0.5	16
HPS95	1	256	16	1	<0.25	4	32	8	128	0.5	128	64	16	128	32	4	0.5	16	2	8	2	4	256
HPS97	1	1	32	1	1	8	1	8	1	2	8	8	4	16	16	1	1	8	8	1	8	16	16
HPS100	0.25	4	4	2	0.25	2	8	4	2	64	8	16	2	4	8	16	0.25	2	2	8	8	4	16
HPS101	0.5	1	1	2	<0.25	0.25	1	0.5	2	1	2	16	128	0.5	4	2	256	2	2	2	8	8	16
HPS107	0.25	1	4	<0.25	0.25	1	0.25	2	4	64	8	32	16	2	512	1	0.25	0.25	0.5	0.25	2	8	16
HPS118	0.25	2	8	<0.25	0.25	4	2	1	1	512	4	8	1	1	4	1	0.25	0.25	2	4	2	16	8
HPS120	8	0.5	2	2	0.5	0.5	0.5	0.5	1	0.5	32	32	16	0.5	0.5	0.5	0.5	16	2	0.5	4	2	4
HPS121	16	0.5	8	0.5	0.5	0.5	0.5	0.5	32	0.5	4	32	32	2	16	0.5	0.5	4	1	4	2	8	32
HPS122	8	0.5	8	0.5	0.5	2	0.5	2	2	0.5	4	8	4	8	4	0.5	0.5	32	0.5	0.5	4	8	8
HPS123	1	0.5	4	1	1	2	1	2	1	0.5	1	2	2	1	0.5	1	1	4	0.5	1	1	4	0.5
HPS125	2	16	64	1	4	4	4	4	4	2	2	8	32	8	128	0.5	4	512	256	8	4	32	64
HPS129	1	0.5	16	1	1	1	1	0.5	1	0.5	2	8	1	1	16	1	1	2	0.5	32	1	16	0.5
HPS134	16	16	128	16	8	16	16	2	16	>512	32	>512	>512	64	512	16	64	64	>512	256	>512	>512	256
HPS136	0.5	0.5	8	1	0.5	0.5	0.5	32	1	0.5	4	16	128	1	4	0.5	0.5	16	1	2	2	16	32
HPS138	16	1	8	0.5	0.5	0.5	2	0.5	1	1	2	4	8	0.5	16	0.5	0.5	8	2	0.5	4	16	1
HPS139	2	64	4	<0.25	<0.25	2	4	2	1	8	512	256	16	8	8	256	512	1	2	32	8	64	512
HPS142	1	1	32	1	2	16	1	32	1	1	16	64	16	64	16	1	1	8	4	1	4	2	32
